# Supplementary material
Source: publisher figshare collection journal article supplement (https://gsapubs.figshare.com/articles/dataset/_/17265713)
Supplement: Supplementary file 1 [file 1]

## Sheet: Stable isotope datasheet
Well	depth (m)	Lithostratigraphic Unit	13C carbonate	s.d.	18O carbonate	s.d.	15N organic (‰)	13C organic (‰)	TOC %	Insoluble %	Carbonate (%)	CN ratio	TON %	Δ13C	87Sr/86Sr (Data is adjusted to SRM987 value of 0.710248)	95% CI (SRM987 (n=4): 87Sr/86Sr: 0.7102770375: 95% CI: 8.23324796169259E-06)
Well A	-36.0576	Upper Carbonate	2.90831	0.0128694	-4.82811	0.0296064	-1.0166	-28.6832	1.1	0.178468	0.821532	32.6491	0.0338918	31.5915
Well A	-26.304	Upper Carbonate	3.01648	0.0160122	-4.91812	0.0287931	-0.9226	-29.3872	1.65	0.237874	0.762126	35.8797	0.0460015	32.4037
Well A	-17.16	Upper Carbonate	2.44979	0.0157991	-4.2877	0.0111734	0.0792	-30.1472	1.118	0.218373	0.781627	42.5281	0.0263085	32.597
Well A	-8.016	Upper Carbonate	2.80225	0.0128925	-4.61256	0.0138431	-0.4628	-30.2992	1.841	0.234028	0.765972	54.9227	0.0335246	33.1014
Well A	-4.968	Upper Carbonate	2.77203	0.0114654	-4.68158	0.0117976	1.3062	-29.7462	1.468	0.201489	0.798511	52.2655	0.0281009	32.5182
Well A	-1.92	Upper Carbonate	2.73443	0.00965411	-5.16154	0.0264909	0.0222	-30.8812	3.562	0.537084	0.462916	57.0082	0.0624849	33.6156
Well A	1.128	Upper Carbonate	2.48108	0.013171	-4.80441	0.0216955	-1.5158	-30.6822	2.33	0.64546	0.35454	41.5172	0.0561403	33.1633
Well A	4.176	Middle Marl	2.54113	0.0165958	-5.40182	0.0195258	0.7602	-31.2702	3.365	0.617844	0.382156	55.2909	0.0608603	33.8113
Well A	7.224	Middle Marl	2.84241	0.0108419	-5.44661	0.0196004	-1.3608	-30.8562	2.108	0.586085	0.413915	39.6707	0.0531625	33.6986
Well A	10.272	Middle Marl	2.75186	0.0111372	-4.98051	0.0191501	-0.1048	-31.3622	2.795	0.489296	0.510704	57.1214	0.0489352	34.1141
Well A	13.32	Middle Marl	2.37249	0.0261665	-5.21178	0.0348055	-0.6108	-30.6342	2.429	0.361658	0.638342	57.3351	0.0423688	33.0067
Well A	16.368	Middle Marl	2.44397	0.0105978	-5.35581	0.0198679	1.5672	-30.5142	2.22	0.56772	0.43228	41.9973	0.052865	32.9582	0.708152	8.1543e-06
Well A	19.416	Middle Marl	2.48936	0.00931282	-5.69579	0.0170508	-1.7188	-31.1202	2.398	0.704535	0.295465	40.4626	0.0592834	33.6096
Well A	22.464	Middle Marl	2.71313	0.0064885	-5.9689	0.0104864	0.0782	-31.0992	2.105	0.710053	0.289947	35.701	0.0589769	33.8123
Well A	25.512	Middle Marl	2.52656	0.0110166	-5.82472	0.0185167	1.5702	-31.0302	2.748	0.776048	0.223952	39.834	0.0690076	33.5568
Well A	28.56	Middle Marl	2.55005	0.0117564	-5.88471	0.0235778	-0.7338	-30.7132	2.696	0.586407	0.413593	43.4181	0.0621024	33.2632
Well A	31.608	Middle Marl	2.62024	0.0159903	-5.74537	0.0208237	-1.9108	-30.8542	2.56	0.596127	0.403873	48.0518	0.0532769	33.4744
Well A	34.656	Middle Marl	2.27272	0.0117684	-5.77441	0.0175416	1.0952	-30.6502	0.467	0.0878686	0.912131	53.9637	0.00865636	32.9229
Well A	37.704	Middle Marl	2.38854	0.0155533	-5.58536	0.0257188	0.3632	-30.9352	3.843	0.665588	0.334412	58.4453	0.0657703	33.3237
Well A	40.752	Middle Marl	1.85227	0.0100397	-5.08132	0.0173318	2.0622	-31.2042	3.201	0.525833	0.474167	62.9214	0.0508755	33.0565
Well A	43.8	Middle Marl	2.60287	0.00922679	-4.87816	0.0253627	-0.3648	-30.5312	3.002	0.523845	0.476155	49.2647	0.0609488	33.1341
Well A	46.848	Middle Marl	2.37664	0.0182863	-4.41473	0.0151638	-3.0648	-30.4542	2.304	0.525825	0.474175	46.6074	0.0494537	32.8308
Well A	49.896	Middle Marl	2.18359	0.00772402	-5.42544	0.0340189	1.0272	-29.1422	3.753	0.550007	0.449993	48.6015	0.0772281	31.3258
Well A	52.944	Middle Marl	2.35031	0.0147058	-5.69135	0.0123274	0.0942	-30.2142	3.52	0.496707	0.503293	56.2041	0.0626367	32.5645
Well A	55.992	Middle Marl	2.27693	0.0218941	-4.36774	0.0241862	2.7502	-31.0152	2.324	0.480588	0.519412	51.7064	0.04496	33.2921
Well A	59.04	Middle Marl	2.37956	0.0132701	-5.23177	0.0194819	0.2852	-29.8382	2.387	0.353001	0.646999	53.2692	0.0448149	32.2178
Well A	62.088	Middle Marl	2.8486	0.00692009	-4.90181	0.01438	-0.1558	-29.4122	2.687	0.419038	0.580962	51.8473	0.0518427	32.2608
Well A	65.136	Middle Marl	2.6731	0.0145653	-4.99712	0.0229636	-0.9948	-29.7682	2.475	0.584123	0.415877	48.6243	0.050918	32.4413
Well A	68.184	Middle Marl	2.43694	0.0160314	-4.79676	0.0279765	1.6952	-30.2312	2.422	0.506125	0.493875	51.6784	0.0468857	32.6681
Well A	71.232	Middle Marl	2.37006	0.0113905	-4.77477	0.0208179	-0.4088	-30.1862	2.183	0.373137	0.626863	49.7383	0.0439026	32.5563
Well A	74.28	Middle Marl	2.56878	0.0132235	-4.5993	0.0379792	-0.2478	-30.7812	2.318	0.423669	0.576331	57.4428	0.0403635	33.35
Well A	77.328	Middle Marl	2.57122	0.0189912	-4.84921	0.028133	-0.2098	-30.8972	2.728	0.398434	0.601566	61.1942	0.0445809	33.4684
Well A	80.376	Middle Marl	2.54659	0.00502147	-4.64381	0.0278235	0.2612	-30.6012	2.385	0.470116	0.529884	48.3719	0.0493161	33.1478
Well A	83.424	Middle Marl	1.82091	0.0148011	-4.45843	0.016657	-0.5578	-30.8522	2.99	0.656078	0.343922	55.0734	0.0543084	32.6731
Well A	86.472	Middle Marl	2.50046	0.0124097	-4.85553	0.0227248	0.2352	-30.5242	2.059	0.47861	0.52139	44.9977	0.045776	33.0247	0.707841	4.71545e-06
Well A	89.52	Middle Marl	2.25854	0.0108762	-4.75423	0.0194119	1.4292	-30.7102	1.693	0.499954	0.500046	42.3188	0.0400226	32.9687
Well A	92.568	Middle Marl	2.48325	0.0056527	-4.9468	0.0174332	0.2322	-31.0432	1.901	0.552471	0.447529	49.5162	0.0383951	33.5265
Well A	95.616	Middle Marl	2.73577	0.0105809	-4.74325	0.0139379	1.6828	-29.3208	2.868	0.401177	0.598823	51.9754	0.0551987	32.0566
Well A	98.664	Middle Marl	2.60153	0.0112363	-5.13624	0.0324303	0.6854	-28.1572	1.488	0.504589	0.495411	32.2399	0.0461646	30.7588
Well A	101.712	Middle Marl	2.80599	0.00893297	-4.95854	0.0222853	1.0278	-28.9608	3.355	0.568601	0.431399	58.0173	0.057831	31.7668
Well A	104.76	Middle Marl	2.69112	0.0191263	-4.86362	0.0213983	1.3258	-29.0868	4.637	0.517881	0.482119	57.0876	0.0812264	31.7779
Well A	107.808	Middle Marl	2.4689	0.0174864	-5.05649	0.0320999	0.9788	-29.0908	4.885	0.600033	0.399967	63.3812	0.077078	31.5597
Well A	110.856	Middle Marl	2.74891	0.0187696	-4.86086	0.0245468	0.7488	-29.4068	5.686	0.587558	0.412442	47.0235	0.120931	32.1557
Well A	113.904	Middle Marl	2.47173	0.0155239	-4.88023	0.0152023	1.0718	-29.5318	3.128	0.415612	0.584388	60.7066	0.0515404	32.0035
Well A	116.952	Middle Marl	1.92955	0.0137354	-4.57553	0.0175939	0.6818	-28.8888	1.344	0.345002	0.654998	48.4153	0.0277754	30.8184
Well A	120	Middle Marl	2.45808	0.0145354	-4.94973	0.0248954	0.8378	-29.1868	3.852	0.558327	0.441673	56.8015	0.0678314	31.6449
Well A	123.048	Middle Marl	2.38332	0.0137731	-4.87744	0.015116	1.2538	-29.1018	2.592	0.428915	0.571085	57.472	0.0451036	31.4851
Well A	126.096	Middle Marl	2.28866	0.0155228	-4.79952	0.0177324	1.1928	-29.0158	4.124	0.4426	0.5574	57.2776	0.0720155	31.3045
Well A	129.144	Middle Marl	2.30767	0.011992	-4.90497	0.0245885	1.1188	-28.9768	3.849	0.588251	0.411749	44.4465	0.0866049	31.2845
Well A	132.192	Middle Marl	2.18225	0.013129	-5.03619	0.0278341	0.9568	-28.6608	3.222	0.655045	0.344955	42.0764	0.0765842	30.843
Well A	135.24	Middle Marl	2.39891	0.0150654	-5.01377	0.0147836	0.8378	-29.3598	4.024	0.664733	0.335267	57.9271	0.0694822	31.7587
Well A	138.288	Middle Marl	1.83231	0.0127442	-4.68559	0.0146543	1.1278	-27.9738	1.468	0.534092	0.465908	42.0602	0.0349067	29.8061
Well A	141.336	Middle Marl	2.31507	0.00854157	-4.80059	0.024719	1.7528	-28.3548	2.532	0.434333	0.565667	40.968	0.0618243	30.6699
Well A	144.384	Middle Marl	2.25932	0.0122422	-4.77862	0.0108494	1.3318	-28.7238	2.397	0.626805	0.373195	50.7338	0.0472655	30.9831
Well A	147.432	Middle Marl	1.96905	0.0142382	-4.72421	0.0197245	0.8158	-28.4068	1.996	0.420842	0.579158	43.3244	0.0460884	30.3759
Well A	150.48	Middle Marl	1.95247	0.0128053	-4.73887	0.0218336	1.0348	-28.8188	4.859	0.571757	0.428243	49.7723	0.0976274	30.7713
Well A	153.528	Middle Marl	1.66424	0.00499657	-4.50435	0.0227299	1.3778	-28.4218	3.484	0.557115	0.442885	50.1604	0.0694686	30.086
Well A	156.576	Middle Marl	2.12539	0.0118002	-4.87413	0.0179232	1.4348	-28.2688	4.86	0.621386	0.378614	46.6578	0.104169	30.3942
Well A	159.624	Middle Marl	2.31509	0.0117075	-4.83998	0.0231776	0.8228	-28.5838	3.202	0.576082	0.423918	38.1752	0.0839011	30.8989
Well A	162.672	Middle Marl	2.14116	0.00952947	-4.70793	0.0361215	1.4898	-27.8528	5.203	0.504862	0.495138	54.2221	0.0959635	29.994
Well A	165.72	Middle Marl	1.59089	0.0107293	-4.42065	0.00978141	2.2038	-28.6538	3.871	0.734774	0.265226	46.6998	0.082892	30.2447
Well A	168.768	Middle Marl	1.70773	0.01359	-4.44277	0.0212362	1.7668	-28.6758	3.837	0.665919	0.334081	46.875	0.0818747	30.3835
Well A	171.816	Middle Marl	1.9348	0.00740329	-4.65525	0.023299	1.7258	-28.5428	5.154	0.672012	0.327988	49.0858	0.105018	30.4776
Well A	174.864	Middle Marl	2.06177	0.0160588	-4.62824	0.031233	2.0638	-28.1448	3.833	0.831076	0.168924	38.0237	0.100815	30.2066
Well A	177.912	Middle Marl	2.04728	0.0151542	-4.73485	0.0191843	1.7028	-27.9148	3.379	0.634255	0.365745	69.2599	0.0487946	29.9621
Well A	180.96	Middle Marl	1.92621	0.0142569	-4.77073	0.03156	1.5738	-28.3318	3.214	0.741062	0.258938	46.6441	0.0689222	30.258
Well A	184.008	Middle Marl	1.55304	0.015664	-4.20447	0.0320118	0.8504	-28.7972	5.471	0.689849	0.310151	55.0369	0.0994109	30.3503
Well A	187.056	Middle Marl	1.90377	0.0130193	-4.18983	0.0196591	1.6018	-27.8558	3.188	0.664786	0.335214	73.6156	0.0433107	29.7596
Well A	190.104	Middle Marl	0.915194	0.0121582	-3.79258	0.00868611	1.0314	-28.2002	2.411	0.486736	0.513264	45.9261	0.0525152	29.1154
Well A	193.152	Middle Marl	0.17752	0.0168619	-5.74791	0.00818805	1.2044	-28.1412	4.439	0.852724	0.147276	45.5601	0.0974348	28.3188
Well A	196.2	Middle Marl	0.147618	0.0121961	-6.20727	0.0236718	0.4404	-29.1142	4.406	0.832881	0.167119	50.0846	0.0879783	29.2619	0.708451	8.17936e-06
Well A	199.248	Middle Marl	1.92904	0.0190885	-5.1495	0.0138557	0.6834	-28.2872	3.752	0.794157	0.205843	45.8371	0.0818627	30.2163
Well A	202.296	Basal Carbonate	2.43489	0.0151999	-4.68961	0.0284195	1.6864	-28.0942	4.22	0.558027	0.441973	54.9275	0.0768449	30.5291
Well A	205.344	Basal Carbonate	2.26945	0.0123733	-4.17939	0.0174638	1.3195	-27.8918	6.403	0.678921	0.321079	16.7098	0.383206	30.1612
Well A	208.392	Basal Carbonate	1.98014	0.0141019	-4.59959	0.0210951	0.8304	-28.1278	3.705	0.697221	0.302779	87.9084	0.0421483	30.1079
Well A	211.44	Basal Carbonate	2.32909	0.0126217	-3.80359	0.0198088	1.7364	-27.8762	2.581	0.414445	0.585555	52.2743	0.049375	30.2053
Well A	214.488	Basal Carbonate	2.38554	0.00446682	-4.48657	0.0207401	1.6574	-27.2042	4.339	0.498062	0.501938	57.5461	0.0754177	29.5898
Well A	217.536	Basal Carbonate	2.39484	0.0143333	-4.16895	0.0176669	1.8334	-27.6132	6.168	0.572236	0.427764	58.8819	0.104753	30.0081
Well A	220.584	Basal Carbonate	2.13195	0.0110113	-4.0682	0.0178091	1.4424	-27.3752	4.078	0.351711	0.648289	58.8869	0.0692666	29.5072
Well A	223.632	Basal Carbonate	1.90231	0.0117448	-3.76244	0.0195587	1.9984	-27.4622	3.462	0.279893	0.720107	54.3391	0.0637222	29.3646
Well A	226.68	Basal Carbonate	1.71751	0.0196636	-3.2237	0.0175371	1.1094	-26.9492	2.886	0.403476	0.596524	45.7974	0.0630367	28.6668
Well A	229.728	Basal Carbonate	2.06411	0.00883894	-3.20356	0.0338032	1.5754	-27.6232	3.378	0.277135	0.722865	59.5291	0.0567529	29.6874
Well A	232.776	Basal Carbonate	2.39922	0.0212314	-3.36006	0.0337744	2.1504	-27.7632	3.015	0.237252	0.762748	65.3884	0.0461208	30.1625
Well A	235.824	Basal Carbonate	2.58803	0.0176691	-2.35472	0.0214472	1.9974	-27.3882	1.988	0.148399	0.851601	57.6018	0.0345164	29.9763
Well A	238.872	Basal Carbonate	2.47879	0.0117764	-2.29358	0.0139755	1.8654	-27.6132	1.998	0.154372	0.845628	68.9722	0.0289706	30.092
Well A	241.92	Basal Carbonate	2.65591	0.0215578	-2.56833	0.018104	-0.1636	-27.7722	1.917	0.127145	0.872855	61.5518	0.0311518	30.4282
Well A	244.968	Basal Carbonate	2.73189	0.0134242	-2.4412	0.0247225	0.3414	-27.8852	1.359	0.267207	0.732793	49.282	0.0275915	30.6171
Well A	248.016	Basal Carbonate	2.22274	0.0135411	-2.6416	0.0289868	-0.4926	-27.9672	1.179	0.135576	0.864424	43.2378	0.0272724	30.19
Well A	251.064	Basal Carbonate	1.54548	0.0132224	-2.38597	0.0123023	-0.0676	-28.1552	1.526	0.279129	0.720871	37.5364	0.0406664	29.7007
Well A	254.112	Basal Carbonate	2.06988	0.00813851	-3.77233	0.019531	-1.2906	-27.7572	0.862	0.0996533	0.900347	43.0818	0.0200099	29.8271
Well A	257.16	Basal Carbonate	2.09909	0.019681	-4.01425	0.0149757	1.5024	-28.0792	1.611	0.19618	0.80382	51.2147	0.0314604	30.1783
Well A	260.208	Basal Carbonate	1.94409	0.0173303	-2.80947	0.0139652	-0.1016	-27.2762	1.124	0.147517	0.852483	51.3589	0.0218879	29.2203
Well A	263.256	Basal Carbonate	1.94923	0.00818895	-2.77294	0.020359	0.2824	-27.4852	1.273	0.13124	0.86876	54.6837	0.0232921	29.4345
Well A	266.304	Basal Carbonate	2.42431	0.00968624	-1.64432	0.0124084	1.0744	-26.8804	0.903	0.28567	0.71433	36.1885	0.024962	29.3047
Well A	269.352	Basal Carbonate	2.8197	0.0177866	-1.55487	0.023381	0.5804	-27.4034	0.597	0.0821659	0.917834	45.9767	0.0129976	30.2231
Well A	272.4	Basal Carbonate	0.253403	0.0100907	-3.27413	0.0253267	0.3324	-28.0384	0.922	0.134192	0.865808	61.1207	0.0150907	28.2918
Well A	275.448	Basal Carbonate	3.21096	0.0131468	-1.62317	0.0166661	0.2904	-28.7544	1.395	0.10146	0.89854	93.7539	0.0148862	31.9654
Well A	278.496	Basal Carbonate	3.25193	0.0103106	-1.74276	0.0208838	0.1084	-28.1004	0.928	0.0685609	0.931439	81.0282	0.0114543	31.3523
Well A	281.544	Basal Carbonate	3.19302	0.00935167	-1.26318	0.0138826	0.2614	-27.4764	2.153	0.113815	0.886185	149.492	0.0144071	30.6694
Well A	284.592	Basal Carbonate	3.15199	0.0131344	-0.841741	0.0311273	-1.2776	-25.5054	0.906	0.0958942	0.904106	73.7934	0.0122874	28.6574	0.707091	6.67811e-06
Well A	287.64	Basal Carbonate	3.38947	0.0109648	-0.912332	0.0197866	-0.6686	-27.9964	0.892	0.10463	0.89537	57.5534	0.0155118	31.3859
Well A	290.688	Basal Carbonate	3.80343	0.0124068	-0.247122	0.0261635	-0.8656	-28.0984	0.512	0.0502323	0.949768	63.2302	0.00810303	31.9018
Well A	293.736	Basal Carbonate	3.70957	0.0201045	-0.00798088	0.0134078	-0.2506	-28.4344	0.987	0.0438651	0.956135	87.0931	0.0113343	32.144
Well A	296.784	Basal Carbonate	3.53943	0.0106928	-0.521818	0.0145582	-0.9036	-27.8308	0.679	0.0645695	0.93543	316.794	0.00214524	31.3702
Well A	299.832	Basal Carbonate	3.8388	0.0124621	-0.16749	0.0215003	-0.9785	-27.5838	0.458	0.0490594	0.950941	24.3741	0.0188312	31.4226
Well A	302.88	Basal Carbonate	2.7437	0.0133332	-1.14749	0.0120136	-1.0805	-28.7108	3.8	0.158003	0.841997	40.7877	0.0931737	31.4545
Well A	305.928	Basal Carbonate	2.83251	0.0122976	-2.88355	0.0204695	-0.1975	-27.6928	5.504	0.192698	0.807302	43.8929	0.125419	30.5253
Well A	308.976	Basal Carbonate	3.15649	0.00952017	-1.62204	0.0195143	3.0715	-26.6928	1.766	0.121718	0.878282	32.5918	0.0541961	29.8492
Well A	312.024	Basal Carbonate	3.74512	0.0232137	-1.50251	0.0258655	-0.1302	-27.913	0.659	0.0546444	0.945356	85.8455	0.00768094	31.6581
Well A	315.072	Basal Carbonate	4.06611	0.0112179	-1.90534	0.0166955	0.1758	-25.259	1.355	0.0497354	0.950265	110.541	0.012266	29.3251
Well A	318.12	Basal Carbonate	2.60123	0.0167088	-1.99826	0.0143214	0.4008	-27.552	1.037	0.152713	0.847287	73.1204	0.0141924	30.1532
Well A	321.168	Basal Carbonate	3.16358	0.00999586	-1.27337	0.0200499	0.5188	-27.505	0.979	0.102527	0.897473	130.574	0.0074984	30.6686
Well A	324.216	Basal Carbonate	3.98032	0.0145312	-1.11146	0.0181396	-0.0192	-27.569	1.003	0.0620432	0.937957	70.0401	0.014332	31.5493
Well A	327.264	Basal Carbonate	2.33829	0.015953	-2.26267	0.00775658	-0.4122	-27.825	0.813	0.0919413	0.908059	96.517	0.00843012	30.1633
Well A	330.312	Basal Carbonate	3.93665	0.0143476	-1.8551	0.0115499	-0.2272	-27.37	0.893	0.0750277	0.924972	112.48	0.00794081	31.3066
Well A	333.36	Basal Carbonate	4.33099	0.0111669	-2.49242	0.0173404	-0.1966	-27.5768	1.445	0.0673303	0.93267	113.182	0.0127703	31.9078
Well A	336.408	Basal Carbonate	4.05181	0.00925208	-2.14232	0.0219288	-0.2592	-25.809	1.203	0.0788477	0.921152	167.397	0.00719199	29.8608
Well A	339.456	Basal Carbonate	2.25009	0.0150544	-2.55243	0.0293179	0.5458	-26.511	1.593	0.263885	0.736115	99.0194	0.0160912	28.7611
Well A	342.504	Basal Carbonate	2.59807	0.0103073	-1.7793	0.0137075	1.1318	-26.926	0.982	0.0737856	0.926214	108.209	0.00907976	29.5241
Well A	345.552	Basal Carbonate	3.05408	0.0189052	-1.85024	0.0219332	0.4688	-26.988	0.329	0.0857045	0.914296	98.4831	0.0033481	30.0421
Well A	348.6	Basal Carbonate	3.60759	0.0143495	-0.97641	0.0293694	0.2614	-27.1108	3.058	0.23821	0.76179	68.2767	0.0447952	30.7184
Well A	351.648	Basal Carbonate	3.63639	0.0121477	-1.46402	0.0267508	-0.5226	-25.5338	2.55	0.122201	0.877799	92.3616	0.0276138	29.1702
Well A	354.696	Basal Carbonate	3.95435	0.01716	-1.6179	0.01861	-0.0572	-28.86	0.621	0.0705865	0.929413	96.7795	0.00642203	32.8143
Well A	357.744	Basal Carbonate	2.58361	0.00708065	-2.11186	0.0189073	-0.9482	-29.213	0.65	0.102329	0.897671	153.598	0.00423526	31.7966
Well A	360.792	Basal Carbonate	3.15422	0.0257854	-2.50813	0.0078121	0.0014	-27.7898	2.836	0.256158	0.743842	72.729	0.0390003	30.944
Well A	363.84	Basal Carbonate	3.95384	0.0162033	-2.32519	0.0122242	-0.0096	-27.7808	1.595	0.126777	0.873223	108.374	0.0147198	31.7346
Well A	366.888	Basal Carbonate	4.22005	0.00958299	-1.85228	0.0305466	0.2874	-27.8468	1.824	0.170766	0.829234	93.2176	0.0195694	32.0669
Well A	369.936	Basal Carbonate	3.99802	0.0102325	-2.25891	0.0214223	1.0364	-28.3328	1.655	0.140558	0.859442	110.394	0.0149982	32.3308
Well A	372.984	Basal Carbonate	3.96448	0.0106853	-1.98117	0.0153912	-0.2492	-26.665	0.342	0.0504302	0.94957			30.6295
Well A	376.032	Basal Carbonate	3.02417	0.0104436	-2.64636	0.0212268	-0.8912	-27.453	1.424	0.124544	0.875456	151.901	0.00937942	30.4772
Well A	379.08	Basal Carbonate	-1.01611	0.00899411	-3.92262	0.0278019	-0.3396	-29.9594	1.859	0.195927	0.804073	123.233	0.0150925	28.9433	0.707141	1.69034e-05
Well A	382.128	Basal Carbonate	3.7885	0.0166521	-2.73493	0.0106041	-0.0062	-28.415	0.415	0.0568503	0.94315	211.294	0.0019666	32.2035
Well A	385.176	Basal Carbonate	3.84985	0.0104615	-2.8088	0.0263228	1.4158	-28.55	0.658	0.0721807	0.927819	186.222	0.00353808	32.3999
Well A	388.224	Basal Carbonate	3.58593	0.00903408	-2.83238	0.0183947	1.4708	-28.585	1.143	0.136632	0.863368	107.472	0.0106366	32.1709
Well A	391.272	Pydol	3.50767	0.00997194	-3.15392	0.0205646	0.3758	-27.552	0.333	0.100574	0.899426	204.941	0.00162529	31.0597
Well A	397.368	Pydol	3.11162	0.0213051	-5.2472	0.0182493	0.5788	-28.201	0.622	0.115244	0.884756	151.928	0.00409925	31.3126
Well A	400.416	Pydol	0.905652	0.013598	-5.9281	0.0340009	1.5068	-28.877	1.759	0.203541	0.796459	115.401	0.0152476	29.7827
Well A	403.464	Pydol	0.138778	0.00763327	-5.46902	0.0175573	0.3318	-29.055	1.204	0.14205	0.85795	135.527	0.00888544	29.1938
Well A	409.56	Pydol	1.01619	0.0102225	-5.80352	0.0258444	1.3108	-28.851	1.907	0.24304	0.75696	128.54	0.0148428	29.8672	0.707135	1.75234e-05
Well	depth (m)	Lithostratigraphic Unit	13C carbonate	s.d.	18O carbonate	s.d.
Well B	19.936	Middle Marl	2.90514	0.028678	-4.62497	0.0195692
Well B	29.08	Middle Marl	2.7087	0.013423	-5.61845	0.0224221
Well B	38.224	Middle Marl	2.55307	0.0206456	-6.14621	0.0362585
Well B	56.512	Middle Marl	1.49903	0.0203903	-3.9394	0.0532015
Well B	65.656	Middle Marl	2.43908	0.0183556	-4.97096	0.0190492
Well B	74.8	Middle Marl	2.86939	0.0123621	-4.88216	0.0129967
Well B	83.944	Middle Marl	2.54392	0.0179895	-4.53075	0.016718
Well B	93.088	Middle Marl	2.51293	0.0113461	-4.6578	0.0302982
Well B	111.376	Middle Marl	0.799169	0.0216505	-4.32275	0.0319378
Well B	129.664	Middle Marl	2.21702	0.134047	-5.61752	0.338533
Well B	138.808	Middle Marl	2.72112	0.0149015	-4.00427	0.0342093
Well B	147.952	Middle Marl	1.88841	0.0119991	-2.73581	0.0283072
Well B	157.096	Middle Marl	2.05365	0.011285	-2.86492	0.0212458
Well B	166.24	Basal Carbonate	2.18367	0.0214081	-3.84135	0.0157535
Well B	175.384	Basal Carbonate	2.62848	0.0132318	-2.82425	0.0206212
Well B	184.528	Basal Carbonate	2.84611	0.0139715	-2.10269	0.0317106
Well B	193.672	Basal Carbonate	2.58787	0.0144786	-2.06416	0.0384814
Well B	202.816	Basal Carbonate	0.947952	0.014471	0.715502	0.0317852
Well B	211.96	Basal Carbonate	2.82946	0.015032	-0.786472	0.0290339
Well B	221.104	Basal Carbonate	3.29062	0.024758	-1.44704	0.0251453
Well B	230.248	Basal Carbonate	2.62221	0.0131951	-3.30755	0.0246545
Well B	239.392	Basal Carbonate	4.11593	0.0212854	-1.15044	0.0124446
Well B	248.536	Basal Carbonate	3.94994	0.0047939	-0.463476	0.0166904
Well B	257.68	Basal Carbonate	4.33174	0.0121085	-1.88133	0.0180915
Well B	266.824	Basal Carbonate	4.45011	0.010716	-0.676511	0.0236984
Well B	275.968	Basal Carbonate	4.43905	0.0215871	-2.05512	0.0224059
Well B	279.016	Basal Carbonate	4.52843	0.00915477	-2.65229	0.016257
Well B	282.064	Basal Carbonate	4.48657	0.0125105	-2.30221	0.0184563
Well B	285.112	Basal Carbonate	3.16347	0.0110452	-0.84885	0.0284499
Well B	288.16	Basal Carbonate	3.54958	0.0218184	-0.426486	0.0179533
Well B	291.208	Basal Carbonate	3.61766	0.0162569	-0.76582	0.0173897
Well B	294.256	Basal Carbonate	4.12043	0.0202642	-0.869116	0.0246296
Well B	297.304	Basal Carbonate	4.35714	0.0164917	-1.36782	0.0318457
Well B	300.352	Basal Carbonate	4.4249	0.0286127	-2.95888	0.0302214
Well B	303.4	Basal Carbonate	4.22969	0.00674165	-3.23014	0.0182608
Well B	306.448	Basal Carbonate	4.28484	0.0114685	-2.41458	0.0212837
Well B	309.496	Basal Carbonate	3.88308	0.0175411	-1.49261	0.0176437
Well B	315.592	Basal Carbonate	3.50245	0.00682209	-3.51389	0.021092
Well B	318.64	Pydol	0.823343	0.00893359	-8.38694	0.0372047
Well B	321.688	Pydol	-0.271253	0.0166465	-6.72153	0.0241079
Well	depth (m)	Lithostratigraphic Unit	13C carbonate	s.d.	18O carbonate	s.d.
Well C	-7.432	Upper Carbonate	2.60152	0.00958267	-4.93229	0.0358174
Well C	-1.336	Upper Carbonate	2.81017	0.0253908	-4.95705	0.0250477
Well C	4.76	Upper Carbonate	2.55128	0.0119489	-5.22806	0.0159234
Well C	10.856	Middle Marl	2.61575	0.0220759	-5.55702	0.0175153
Well C	16.952	Middle Marl	2.70165	0.0151954	-5.88613	0.0139618
Well C	23.048	Middle Marl	2.72404	0.0177182	-6.07364	0.0291602
Well C	29.144	Middle Marl	2.29762	0.0127195	-5.15007	0.0130089
Well C	35.24	Middle Marl	3.28776	0.0179093	-5.18524	0.0266136
Well C	41.336	Middle Marl	2.54047	0.0158506	-5.19615	0.0137747
Well C	47.432	Middle Marl	2.86559	0.0212158	-4.87959	0.0292429
Well C	53.528	Middle Marl	3.06905	0.0172829	-4.96738	0.0217953
Well C	59.624	Middle Marl	3.11442	0.0186127	-5.03688	0.0236467
Well C	65.72	Middle Marl	2.48532	0.015213	-4.63694	0.0256845
Well C	71.816	Middle Marl	2.68873	0.0134658	-5.24513	0.0286899
Well C	77.912	Middle Marl	2.05592	0.0147995	-4.72879	0.0349896
Well C	84.008	Middle Marl	1.9038	0.012396	-4.01943	0.0184059
Well C	90.104	Middle Marl	2.2025	0.0160692	-4.69852	0.0342656
Well C	96.2	Middle Marl	2.14549	0.0181947	-4.38204	0.020007
Well C	102.296	Middle Marl	0.0908436	0.0110769	-6.84351	0.025762
Well C	108.392	Middle Marl	2.21801	0.0185798	-4.37087	0.0201831
Well C	114.488	Basal Carbonate	2.29065	0.0101543	-4.17518	0.0171313
Well C	120.584	Basal Carbonate	1.8648	0.0175877	-3.09114	0.0204483
Well C	126.68	Basal Carbonate	1.72412	0.0171153	-2.55307	0.0354536
Well C	132.776	Basal Carbonate	1.64605	0.0122052	-3.38427	0.0228078
Well C	138.872	Basal Carbonate	2.51591	0.0145782	-3.09837	0.019892
Well C	144.968	Basal Carbonate	2.811	0.0203478	-3.08259	0.0326544
Well C	146.187	Basal Carbonate		0.0177486	-13.2279	0.0366458
Well C	148.016	Basal Carbonate	1.23488	0.00899617	-3.512	0.0199965
Well C	151.064	Basal Carbonate	3.19759	0.013718	-2.19433	0.0266643
Well C	154.112	Basal Carbonate	4.24591	0.0176025	-0.691525	0.034704
Well C	157.16	Basal Carbonate	2.95572	0.0104757	-2.22341	0.0115058
Well C	160.208	Basal Carbonate	3.66979	0.0109933	-1.38939	0.0237009
Well C	163.256	Basal Carbonate	4.29397	0.0195869	-0.0138459	0.0276209
Well C	166.304	Basal Carbonate	3.73523	0.0163772	-2.44805	0.0196388
Well C	169.352	Basal Carbonate	3.89156	0.00807262	-2.98828	0.027837
Well C	172.4	Basal Carbonate	3.79691	0.0214011	-3.02355	0.0222755
Well C	175.448	Basal Carbonate	4.05002	0.0160032	-2.97286	0.0492848
Well C	178.496	Basal Carbonate	4.18041	0.0147665	-1.97449	0.0304675
Well C	181.544	Basal Carbonate	3.27451	0.0128233	-1.14488	0.0224984
Well C	184.592	Basal Carbonate	2.87107	0.0182109	-2.3736	0.0366747
Well C	187.64	Basal Carbonate	3.2453	0.0099373	-2.30586	0.0331524
Well C	190.688	Basal Carbonate	3.54159	0.0172586	-2.56951	0.0233751
Well C	193.736	Basal Carbonate	3.79706	0.0216719	-3.0059	0.0284657
Well C	196.784	Basal Carbonate	3.81929	0.0149783	-3.01185	0.025191
Well C	199.832	Basal Carbonate	3.80043	0.0130479	-3.22312	0.0179005
Well C	202.88	Basal Carbonate	3.89426	0.0124769	-3.61781	0.0314517
Well C	205.928	Pydol	0.66923	0.114656	-9.39719	0.155453
Well C	208.976	Pydol	3.3073	0.0148624	-4.07616	0.0130933
Well C	212.024	Pydol	2.0517	0.0117278	-4.94206	0.0132751
Well C	215.072	Pydol	1.32561	0.0179272	-5.81724	0.0158944

## Sheet: Strontium Isotope
Sample ID	87Sr/86Sr	95% CI
16.368	0.708152	8.1543e-06
86.472	0.707841	4.71545e-06
196.2	0.708451	8.17936e-06
284.592	0.707091	6.67811e-06
379.08	0.707141	1.69034e-05
409.56	0.707135	1.75234e-05
SRM987 (n=4)	0.710277	8.23325e-06
Data is adjusted to SRM987 value of 0.710248 and the ratios are directly comparable to the seawater evolution of ~500 Ma

## Sheet: G49662
Eldrett, J.S., 2022, Middle Oxfordian carbon cycle perturbation expressed in the Smackover Formation, Gulf of Mexico: Geology, https://doi.org/10.1130/G49662.1
